# Supplementary material
Source: PubMed Central journal article supplement (PMC308766)
Supplement: nar_32_suppl-1_D586__2.pdf [file nar_32_suppl-1_D586__2.pdf]

## Structure viewer image

### Structures

Select molecule

pdb1bnb (D001838) ▾

Special cartoon

Wireframe

Spacefill

Ball & Stick

Backbone

Sticks

Click [here](#) to download Chime.

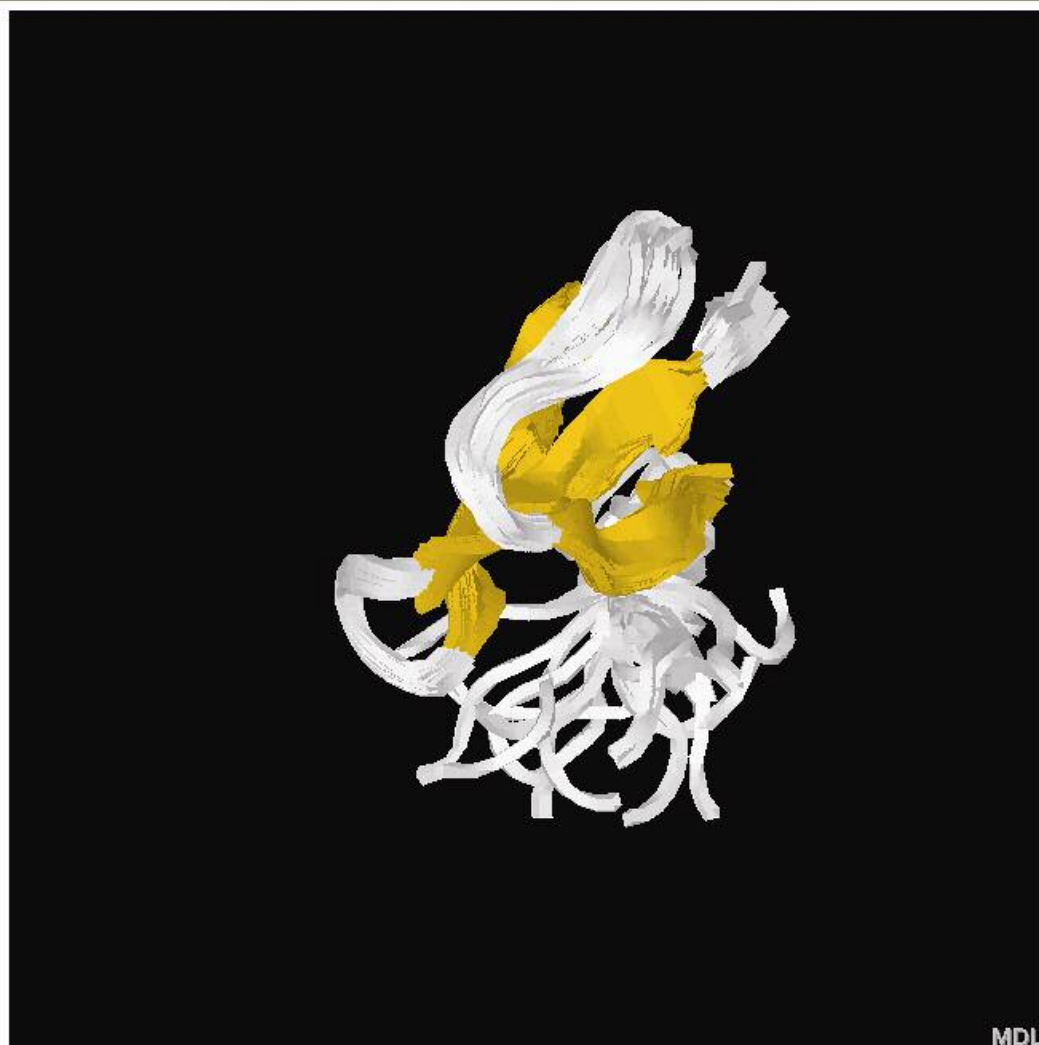

Chime Messages :

```
zap true; load pdb db/pdb1bnb.pdb; wireframe off; cartoons; color structure; sel
```

Supplementary Figure 2: Structure viewer image shows the PDB structures of AMPs. The structures can be viewed with the Chime program that is compatible with Netscape navigator. The figure shows the structure of beta defensin, (BNDB-12) from *Bos taurus*.
